# Supplementary material
Source: ML conference proceedings conference paper supplement (https://openreview.net/forum?id=W88ZBOw6vc)
Supplement: supplementary_material [file attachment]

## Narrow AI system

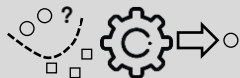

## GPAIS

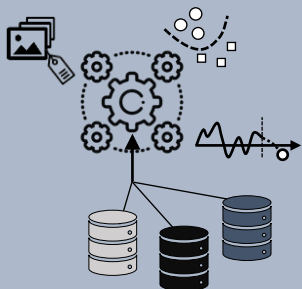

## Closed-world GPAIS

Optimize performance across *known* tasks

Exploit synergies among known tasks

Enough training data for all tasks

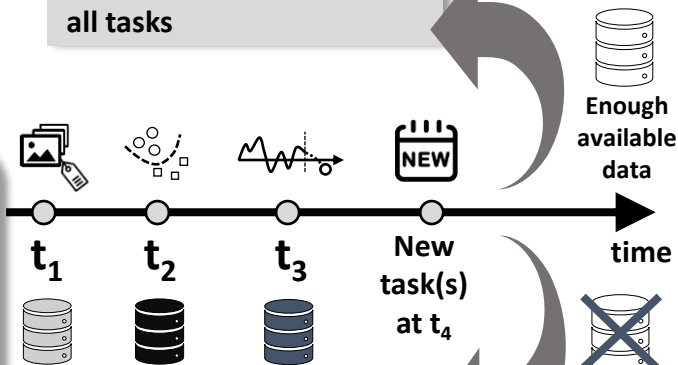

## Open-world GPAIS

Promote model diversity

Leverage previous knowledge for new tasks

Limited or no data about the new task(s)

Scarce/no available data
